# Supplementary material for: ARGNet: using deep neural networks for robust identification and classification of antibiotic resistance genes from sequences
Source: PubMed Central journal article supplement (PMC11080312; doi:10.1186/s40168-024-01805-0), 2024-05-09
Supplement: 40168_2024_1805_MOESM1_ESM.pdf [file 40168_2024_1805_MOESM1_ESM.pdf]

## Residual block

The layers in ResBlock were implemented as:

“ BatchNormalization - RELU - Conv1d - 12 regularizers - BatchNormalization - RELU - Conv1D ”.

## Supplementary Tables

**Table S1 Autoencoder in ARGNet-L. Adam optimizer was utilized with learning rate 1e-4 and trained with batch-size of 256.**

| Model      | Layer              | Kernel number | Kernel size |
|------------|--------------------|---------------|-------------|
| Encoder    | Conv1D             | 512           | 20          |
|            | BatchNormalization | NA            | NA          |
|            | RELU               | NA            | NA          |
|            | ResBlock           | 512, 128      | 9           |
|            | MaxPooling         | NA            | 2           |
|            | ResBlock           | 512, 128      | 9           |
|            | MaxPooling         | NA            | 2           |
|            | Conv1D             | 256           | 8           |
|            | BatchNormalization | NA            | NA          |
|            | RELU               | NA            | NA          |
|            | ResBlock           | 256, 64       | 8           |
|            | MaxPooling         | NA            | 2           |
|            | ResBlock           | 256, 64       | 8           |
|            | MaxPooling         | NA            | 2           |
|            | ResBlock           | 256, 64       | 7           |
|            | MaxPooling         | NA            | 2           |
|            | ResBlock           | 265, 64       | 7           |
| MaxPooling | NA                 | 2             |             |
| Decoder    | ResBlock           | 256, 64       | 7           |
|            | Upsampling         | NA            | 2           |
|            | ResBlock           | 256, 64       | 7           |
|            | Upsampling         | NA            | 2           |
|            | ResBlock           | 256, 64       | 8           |
|            | Upsampling         | NA            | 2           |
|            | ResBlock           | 256, 64       | 8           |
|            | Upsampling         | NA            | 2           |
|            | Conv1D             | 512           | 20          |
|            | BatchNormalization | NA            | NA          |
|            | ResBlock           | 512, 128      | 9           |
|            | Upsampling         | NA            | 2           |
|            | ResBlock           | 512, 128      | 9           |
|            | Upsampling         | NA            | 2           |
|            | Conv1D             | 512           | 20          |
|            | Conv1D             | 22            | 12          |

**Table S2 Convolutional neural network (CNN) in ARGNet-L. Adam optimizer was utilized with learning rate of 0.001 and trained with batch-size of 256.**

| Model | Layer                | Kernel number | Kernel size |
|-------|----------------------|---------------|-------------|
| CNN   | Conv1d               | 512           | 20          |
|       | Maxpooling           | NA            | 4           |
|       | Conv1d               | 512           | 15          |
|       | Maxpooling           | NA            | 2           |
|       | Conv1d               | 512           | 12          |
|       | Conv1d               | 512           | 12          |
|       | GlobalAveragePooling | NA            | NA          |
|       | Dense                | 512           | NA          |
|       | Dense                | 36            | NA          |

**Table S3 Autoencoder in ARGNet-S. Adam optimizer was utilized with learning rate of 1e-4 and trained with batch-size of 2048.**

| Model              | Layer              | Kernel number | Kernel size |
|--------------------|--------------------|---------------|-------------|
| Encoder            | Conv1D             | 400           | 8           |
|                    | BatchNormalization | NA            | NA          |
|                    | RELU               | NA            | NA          |
|                    | ResBlock           | 400, 400      | 4           |
|                    | ResBlock           | 400, 400      | 4           |
|                    | MaxPooling         | NA            | 2           |
|                    | Conv1D             | 200           | 3           |
|                    | BatchNormalization | NA            | NA          |
|                    | RELU               | NA            | NA          |
|                    | ResBlock           | 200, 200      | 3           |
|                    | ResBlock           | 200, 200      | 3           |
|                    | MaxPooling         | NA            | 2           |
|                    | ResBlock           | 200, 200      | 3           |
|                    | MaxPooling         | NA            | 2           |
|                    | ResBlock           | 200, 200      | 3           |
|                    | Decoder            | ResBlock      | 200, 200    |
| Upsampling         |                    | NA            | 2           |
| ResBlock           |                    | 200, 200      | 3           |
| Upsampling         |                    | NA            | 2           |
| ResBlock           |                    | 200, 200      | 3           |
| Upsampling         |                    | NA            | 2           |
| ResBlock           |                    | 200, 200      | 3           |
| Conv1D             |                    | 400           | 8           |
| BatchNormalization |                    | NA            | NA          |
| RELU               |                    | NA            | NA          |
| ResBlock           |                    | 400, 400      | 4           |
| Upsampling         |                    | NA            | 2           |
| ResBlock           |                    | 400, 400      | 4           |
| ResBlock           |                    | 400, 400      | 4           |
| ResBlock           |                    | 400, 400      | 4           |
| ResBlock           |                    | 400, 400      | 4           |

|  |        |     |   |
|--|--------|-----|---|
|  | Conv1D | 400 | 8 |
|  | Conv1D | 22  | 5 |

**Table S4 CNN in ARGNet-S. Adam optimizer was utilized with learning rate 0.001 (learning rate decay of 0.001) and trained with batch-size of 2048.**

| Model | Layer                | Kernel number | Kernel size |
|-------|----------------------|---------------|-------------|
| CNN   | SeparableConv1D      | 512           | 25          |
|       | BatchNormalization   | NA            | NA          |
|       | SeparableConv1D      | 512           | 20          |
|       | BatchNormalization   | NA            | NA          |
|       | SeparableConv1D      | 512           | 15          |
|       | BatchNormalization   | NA            | NA          |
|       | SeparableConv1D      | 512           | 12          |
|       | SeparableConv1D      | 512           | 12          |
|       | GlobalAveragePooling | NA            | NA          |
|       | Dense                | 512           | NA          |
|       | GlobalAveragePooling | NA            | NA          |
|       | Dense                | 256           | NA          |
|       | GlobalAveragePooling | NA            | NA          |
|       | Dense                | 128           | NA          |
|       | GlobalAveragePooling | NA            | NA          |
|       | Dense                | 64            | NA          |
| Dense | 36                   | NA            |             |

**Table S5 Weight sum distribution along sequence position of ARGs.**

| ARGs category   | Position | Weight sum (median) | Number of sequences | Sequence length (median) | Position proportion* |
|-----------------|----------|---------------------|---------------------|--------------------------|----------------------|
| Beta-lactam     | 161-192  | 464.94              | 1732                | 291                      | 0.55                 |
| Multidrug       | 225-256  | 472.44              | 987                 | 413                      | 0.54                 |
| Bacitracin      | 161-192  | 573.13              | 852                 | 275                      | 0.59                 |
| MLS             | 193-224  | 474.11              | 507                 | 498                      | 0.39                 |
| Aminoglycoside  | 161-192  | 437.42              | 332                 | 259                      | 0.62                 |
| Polymyxin       | 193-224  | 477.99              | 207                 | 660                      | 0.29                 |
| Tetracycline    | 193-224  | 478.66              | 130                 | 388                      | 0.50                 |
| Fosfomycin      | 65-96    | 426.08              | 129                 | 140                      | 0.46                 |
| Chloramphenicol | 97-128   | 469.20              | 112                 | 216                      | 0.45                 |
| Glycopeptide    | 161-192  | 529.03              | 96                  | 294                      | 0.55                 |
| Quinolone       | 129-160  | 480.02              | 78                  | 226                      | 0.57                 |
| Peptide         | 257-288  | 535.36              | 45                  | 541                      | 0.48                 |
| Sulfonamide     | 161-192  | 479.53              | 35                  | 279                      | 0.58                 |
| Trimethoprim    | 33-64    | 396.01              | 36                  | 157                      | 0.21                 |

\*Position proportion is calculated as start position divided by median sequence length, for example, the position proportion of beta-lactam is 161/291.

For class B betalactamase, Timothy Palzkill, et al. (2012) found that 120th-263th amino acids constructed the active site.

## Supplementary Figures

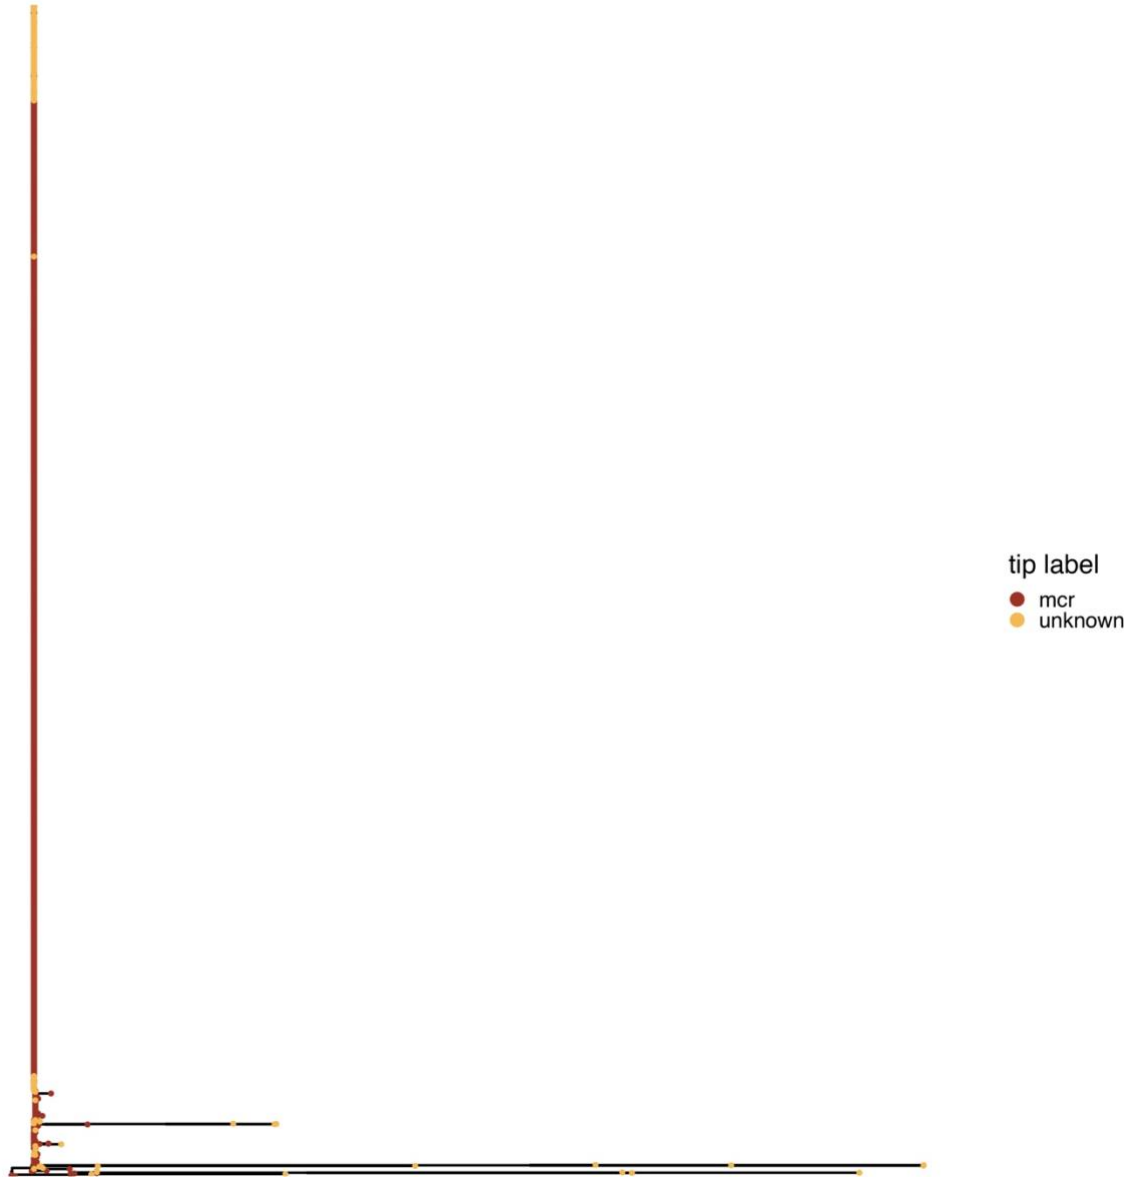

Fig. S1 Phylogenetic tree of *mcr-1* gene.

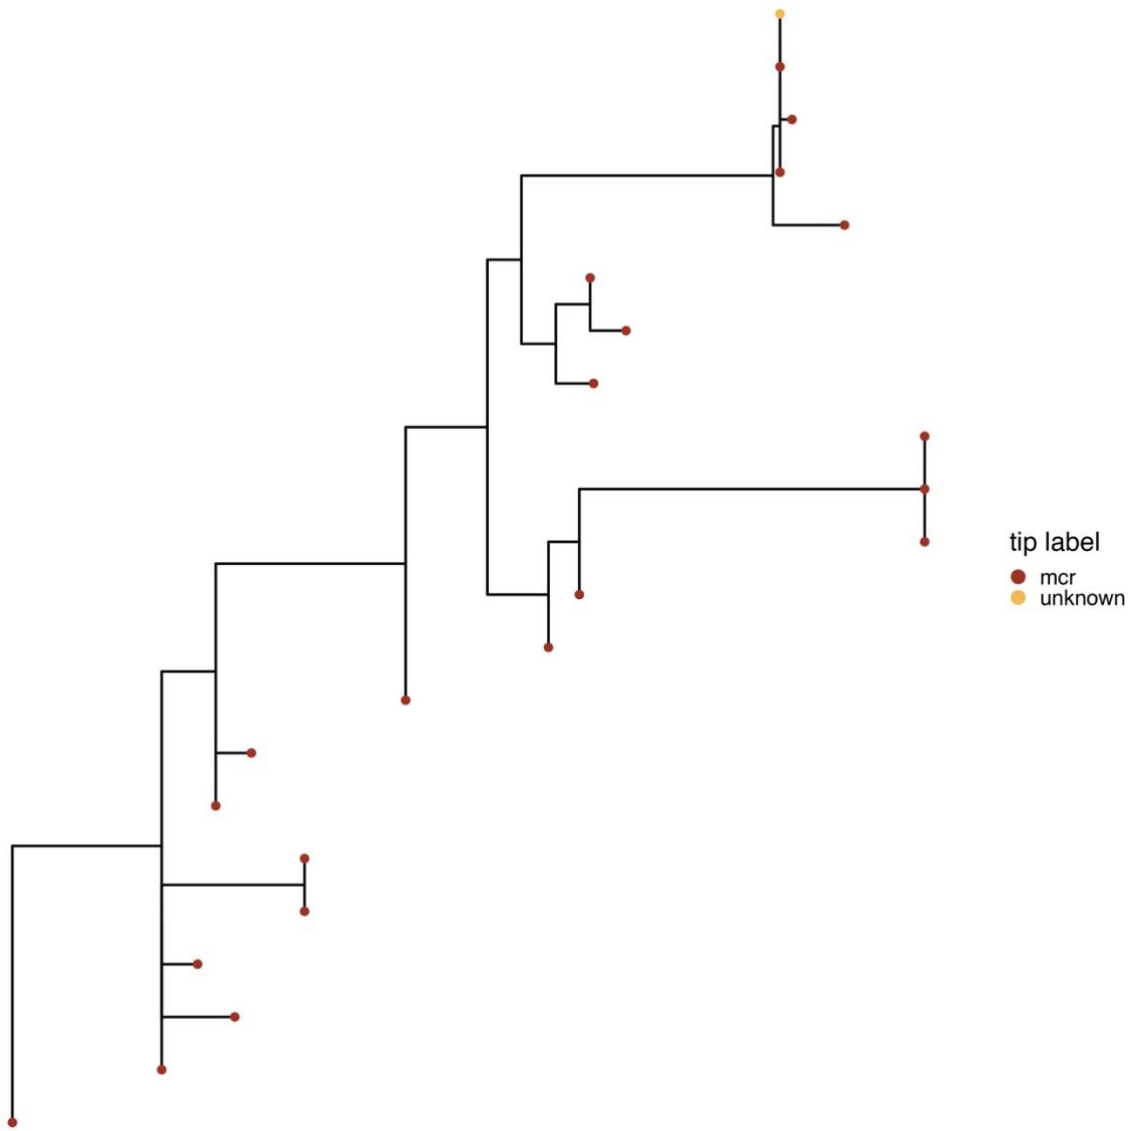

Fig. S2 Phylogenetic tree of *mcr-2* gene.

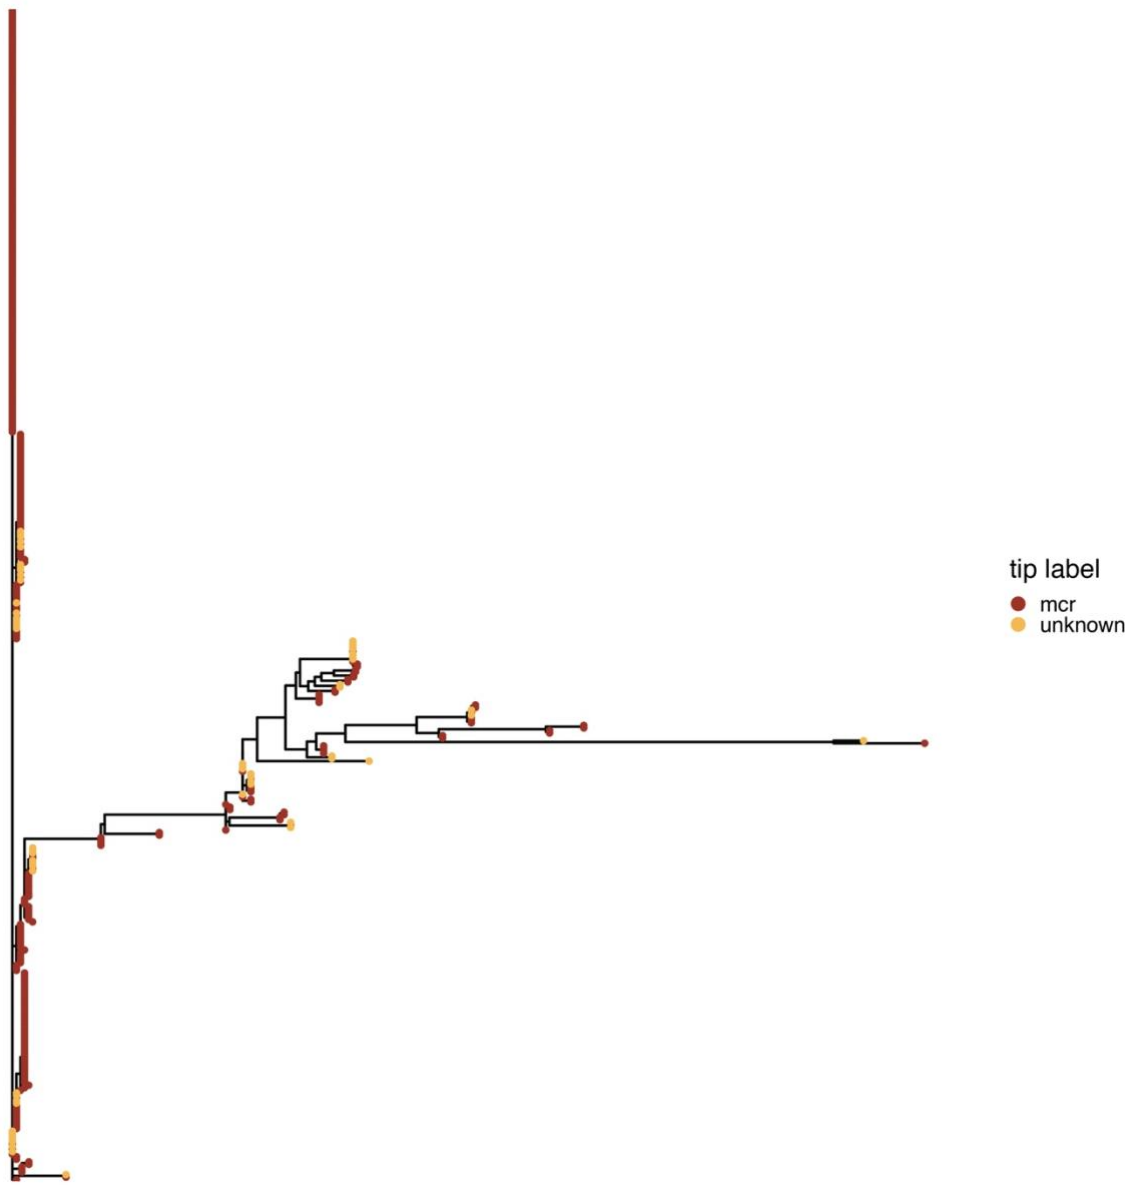

Fig. S3 Phylogenetic tree of *mcr-3* gene.

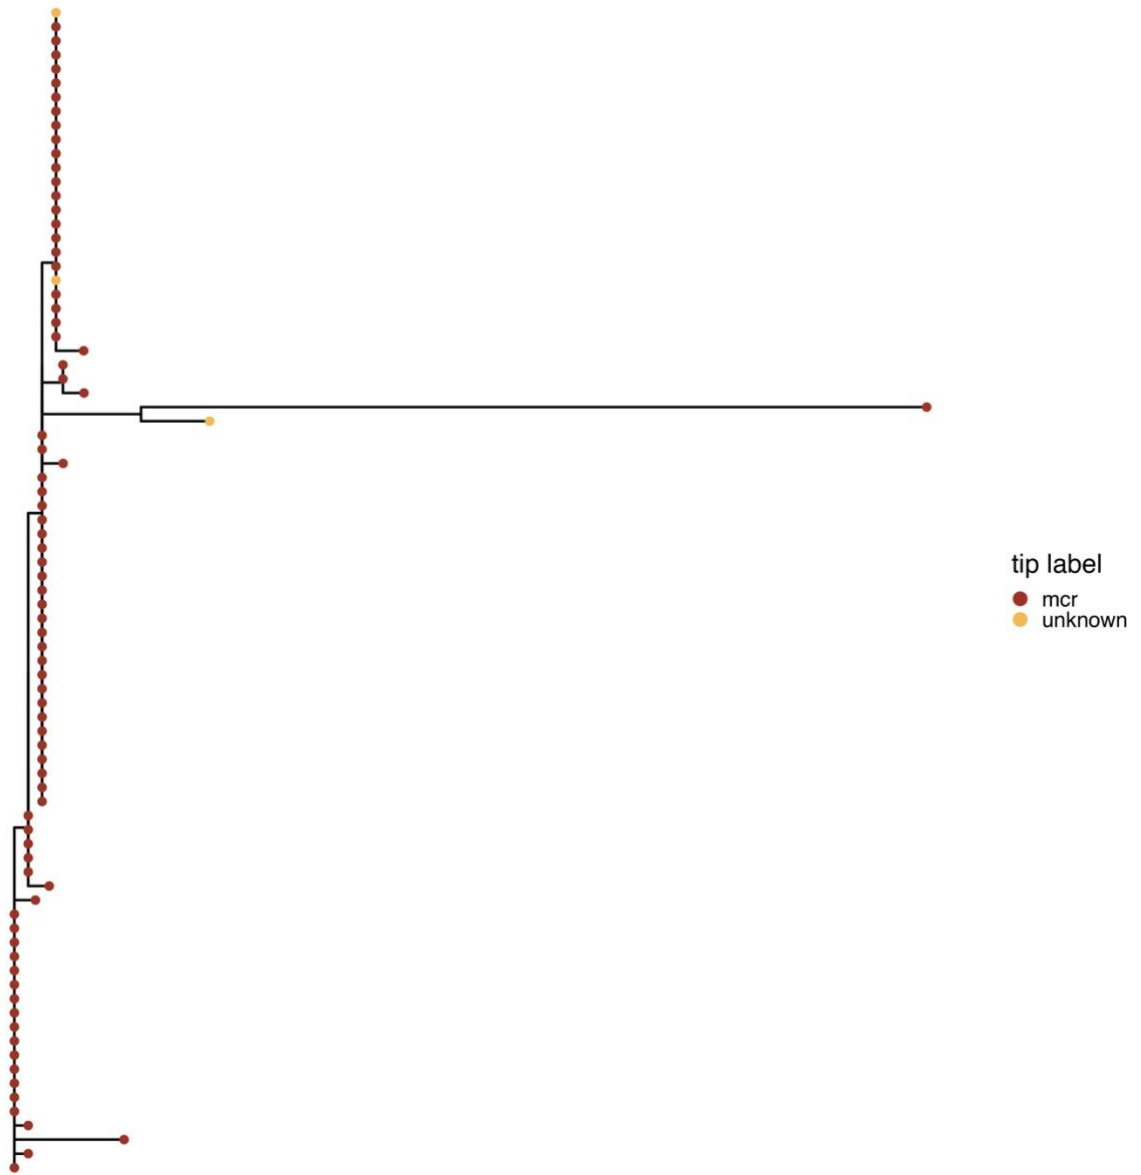

Fig. S4 Phylogenetic tree of *mcr-4* gene.

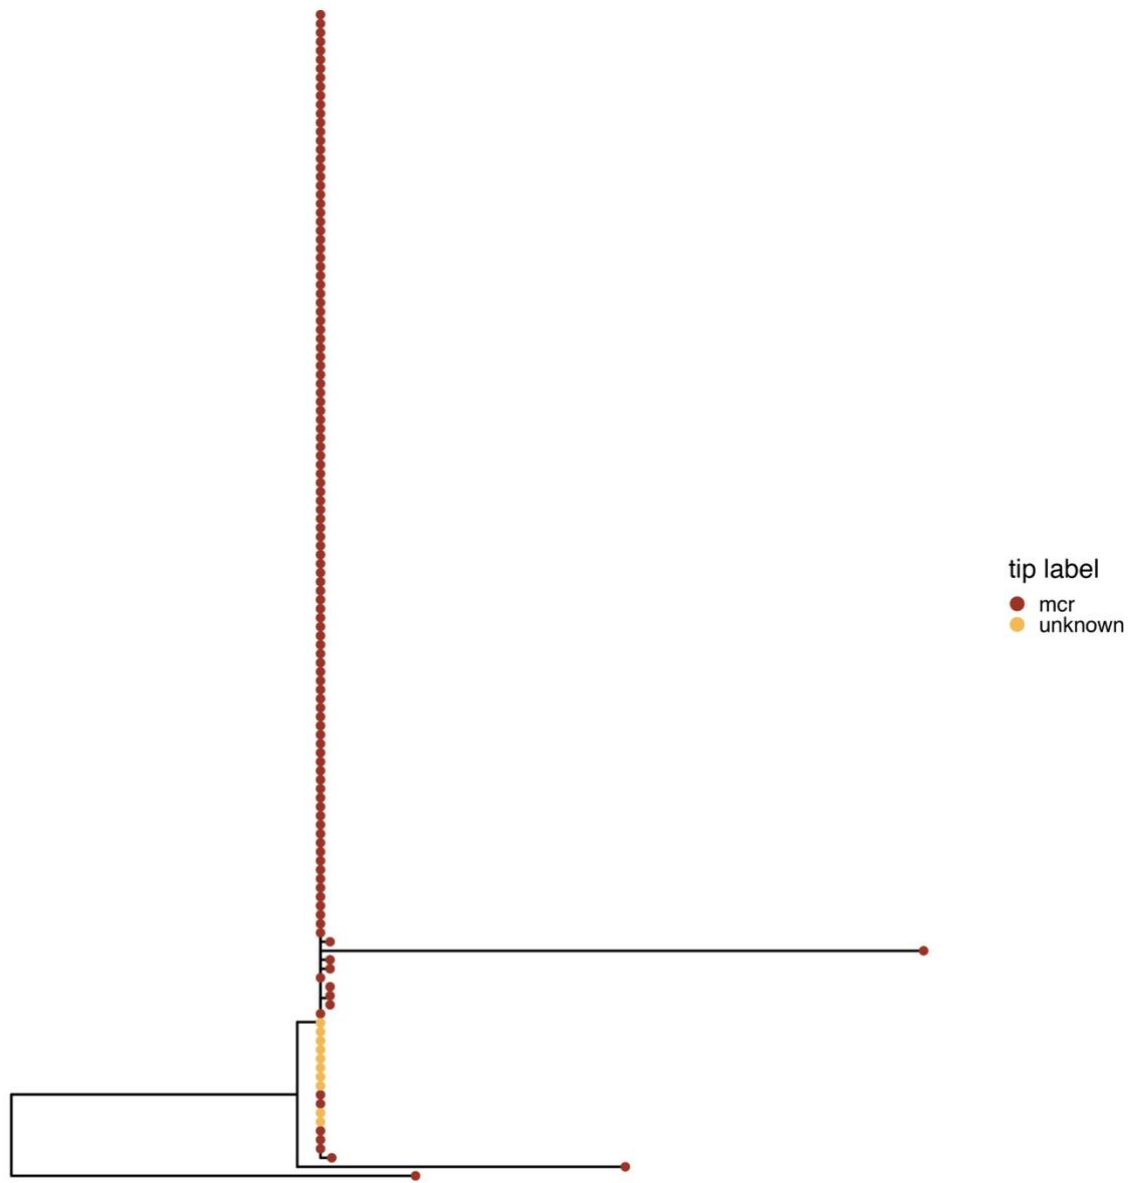

Fig. S5 Phylogenetic tree of *mcr-5* gene.



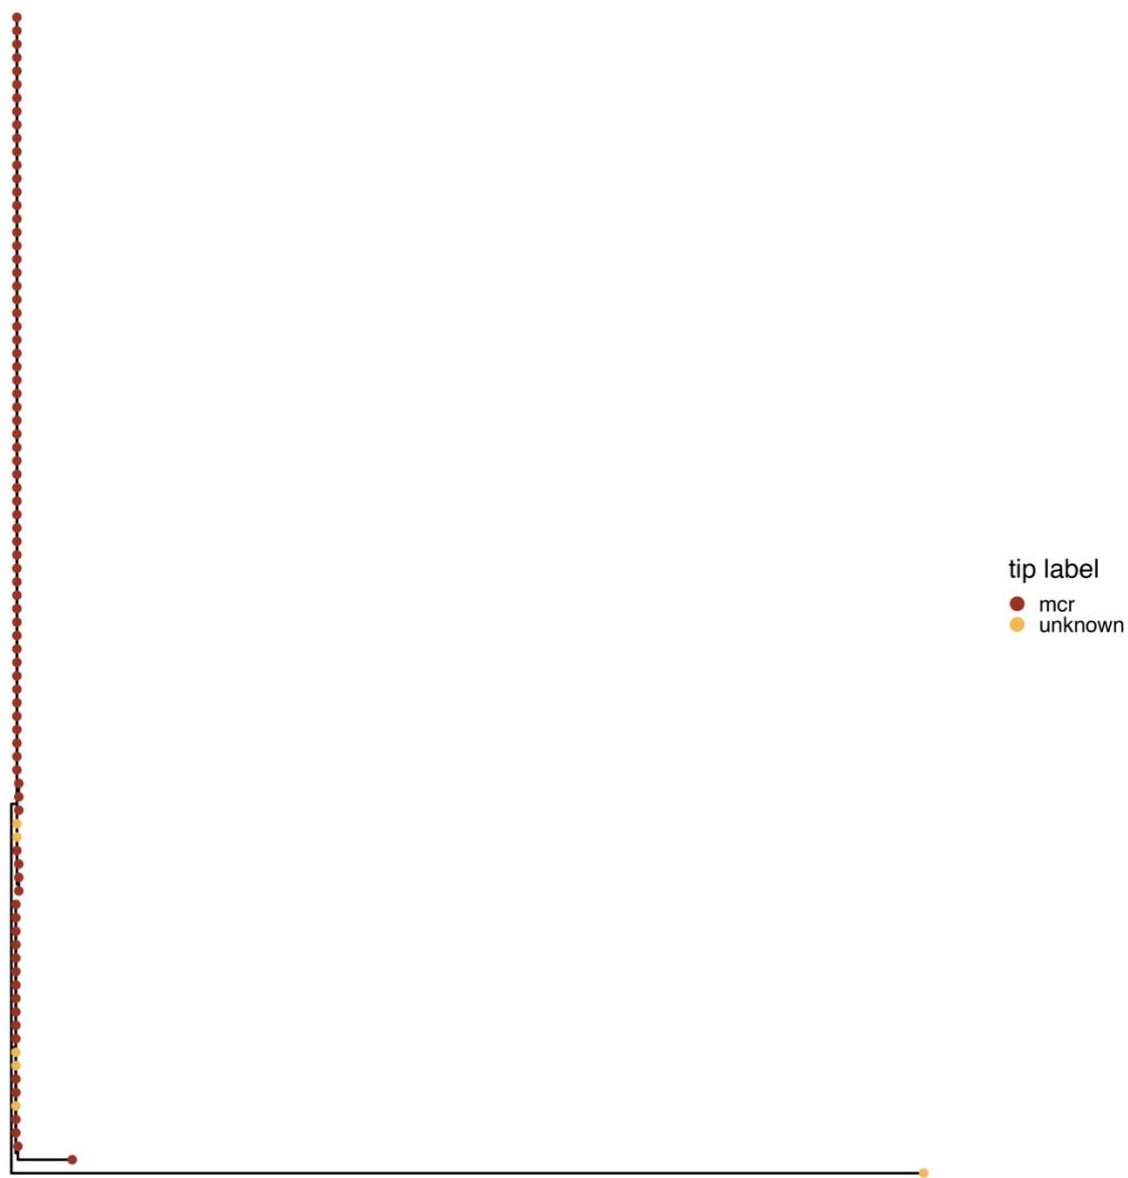

Fig. S6 Phylogenetic tree of *mcr-8* gene.

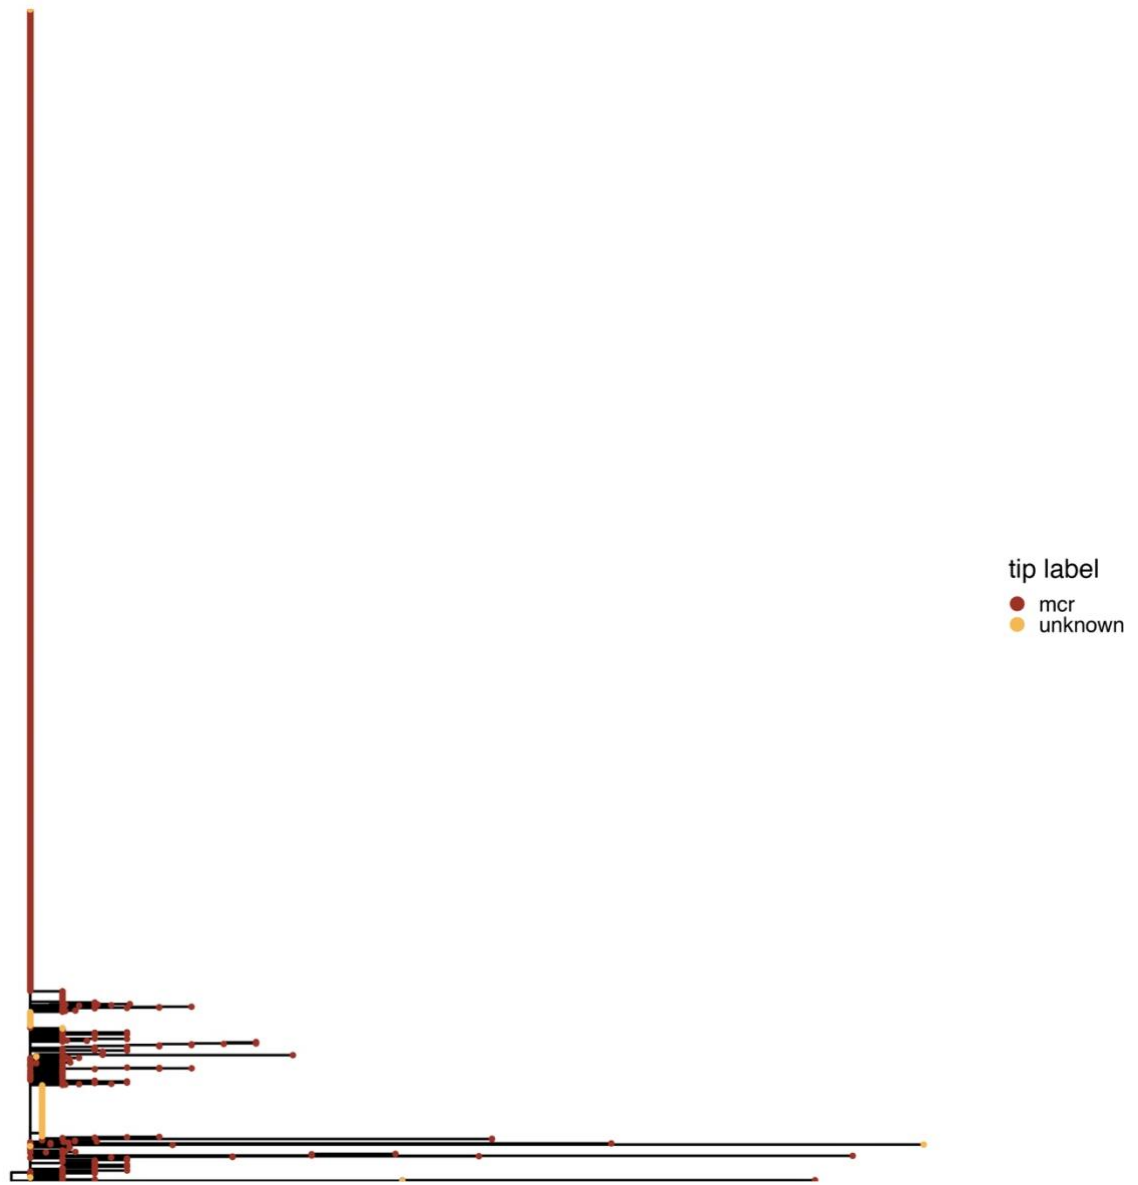

Fig. S7 Phylogenetic tree of *mcr-9* gene.

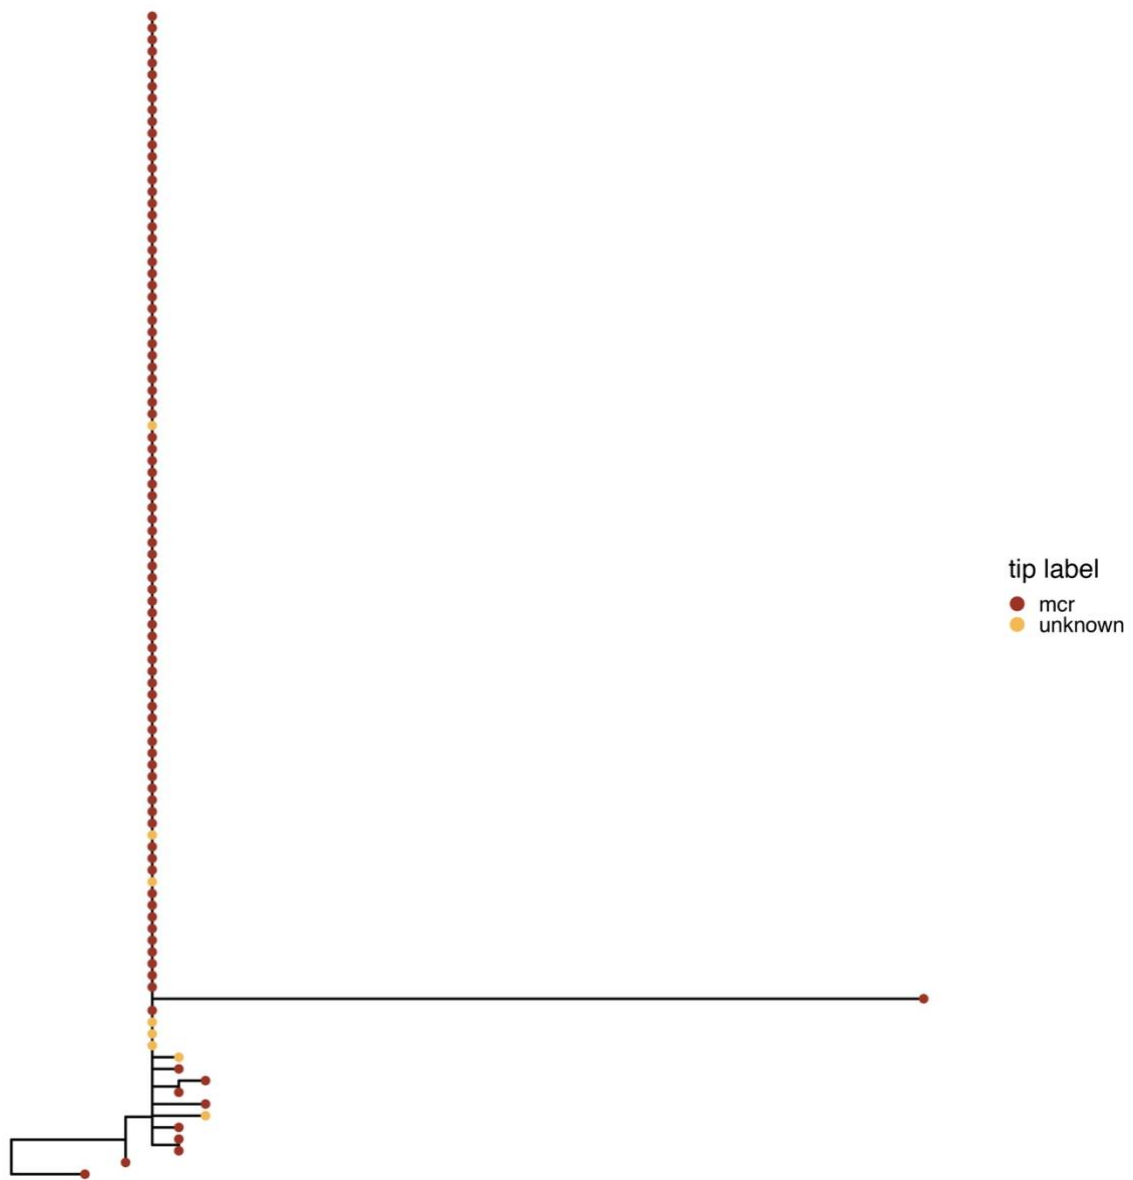

Fig. S8 Phylogenetic tree of *mcr-10* gene.

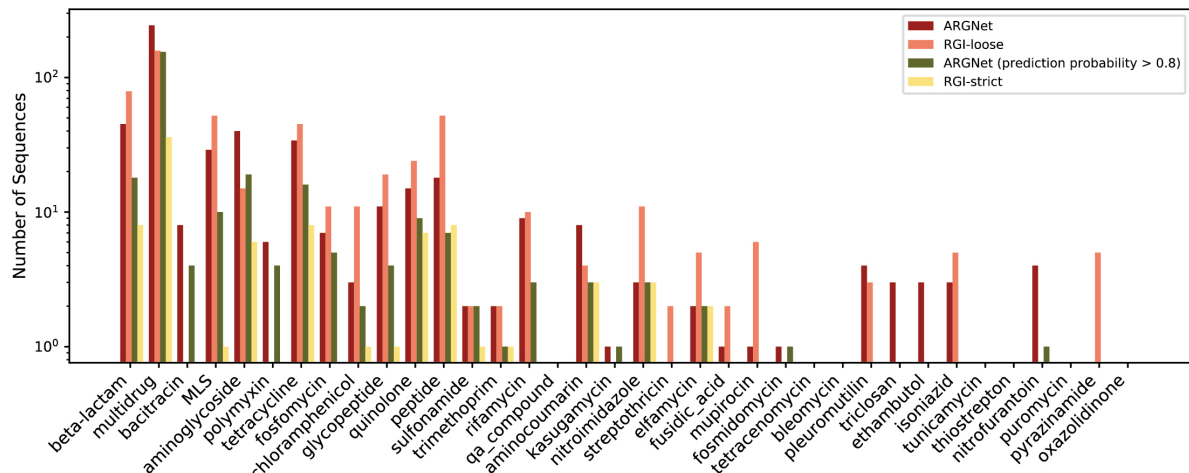

a

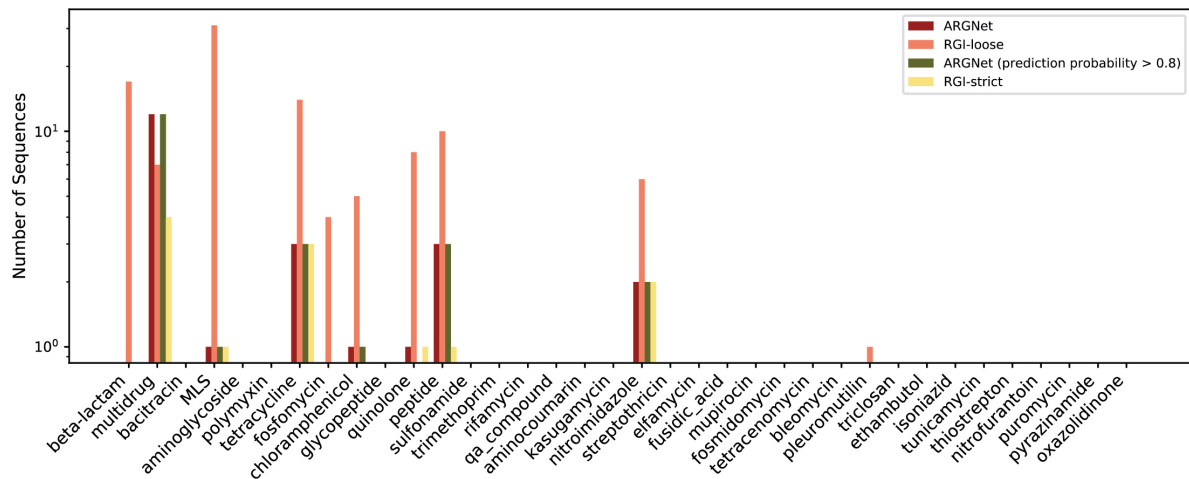

b

**Fig. S9 Prediction on *E. coli* K12 sequences with ARGNet and RGI. a** Classification results of the *E. coli* K12 sequences identified as ARGs by ARGNet and RGI. **b** Classification results of the transporters sequences from *E. coli* K12 identified as ARGs by ARGNet and RGI.

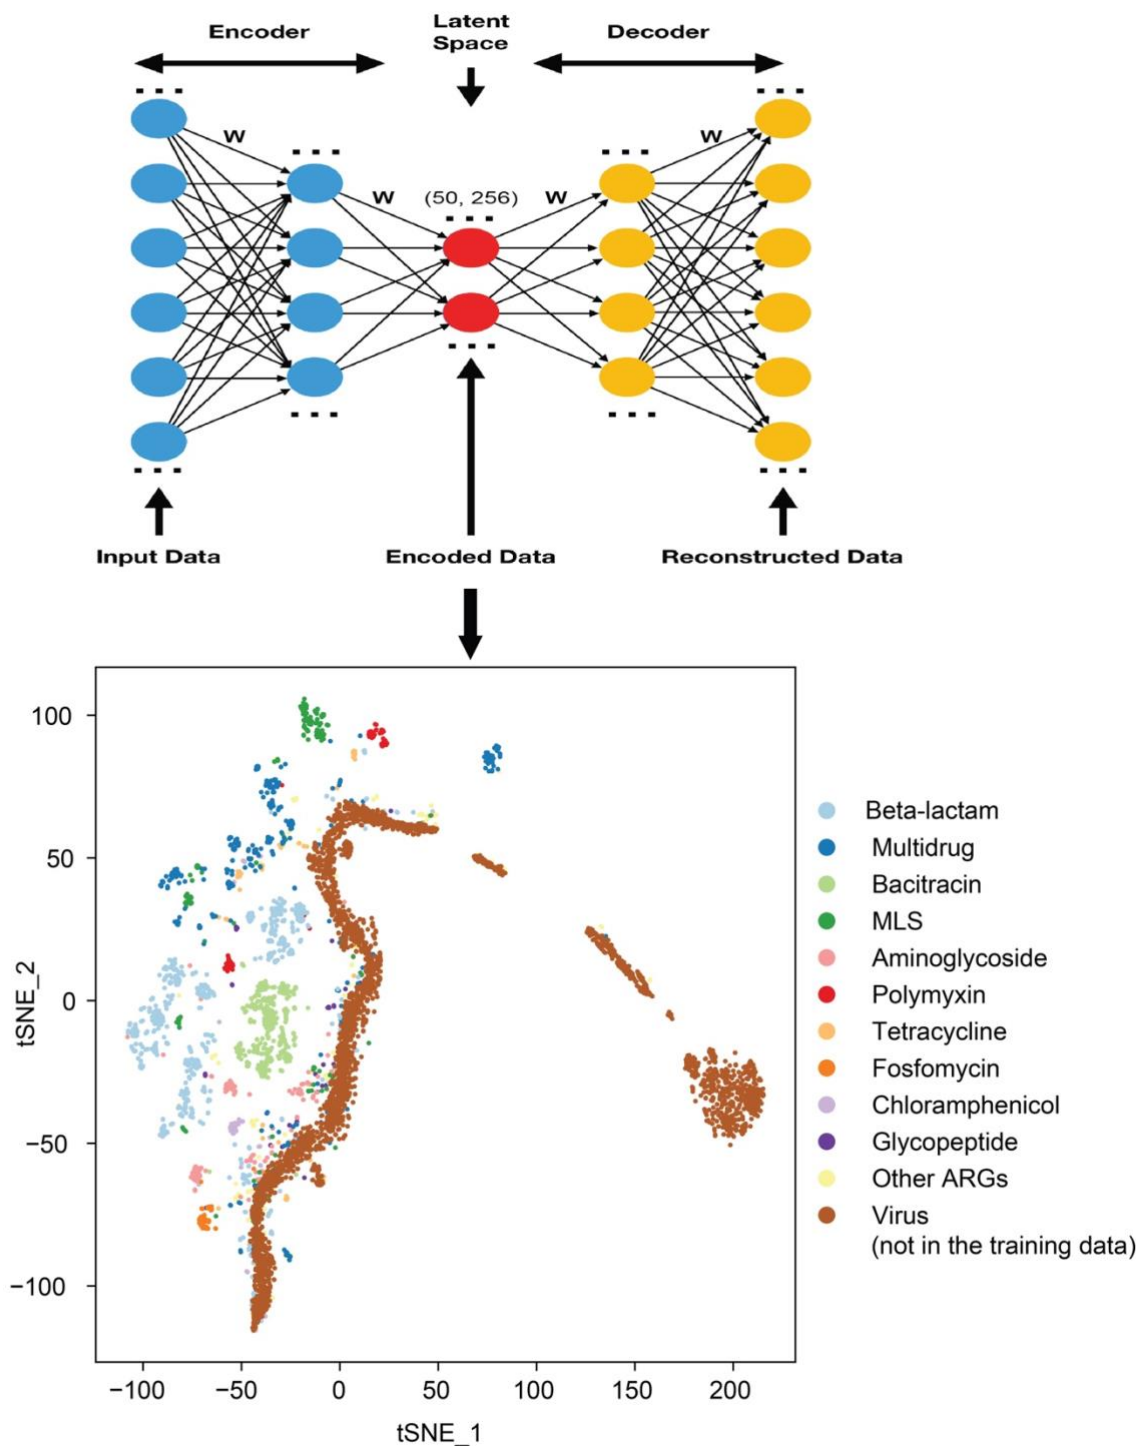

**Fig. S10: Latent space representation of autoencoder.** The upper part is the illustration of autoencoder model.  $W$  denotes the weight of each neuron learned and optimized from the input data. The lower part is dimension reduction via tSNE of the latent space extracted from the ARGNet's autoencoder trained by our ARG reference data ( $n=21971$ ).

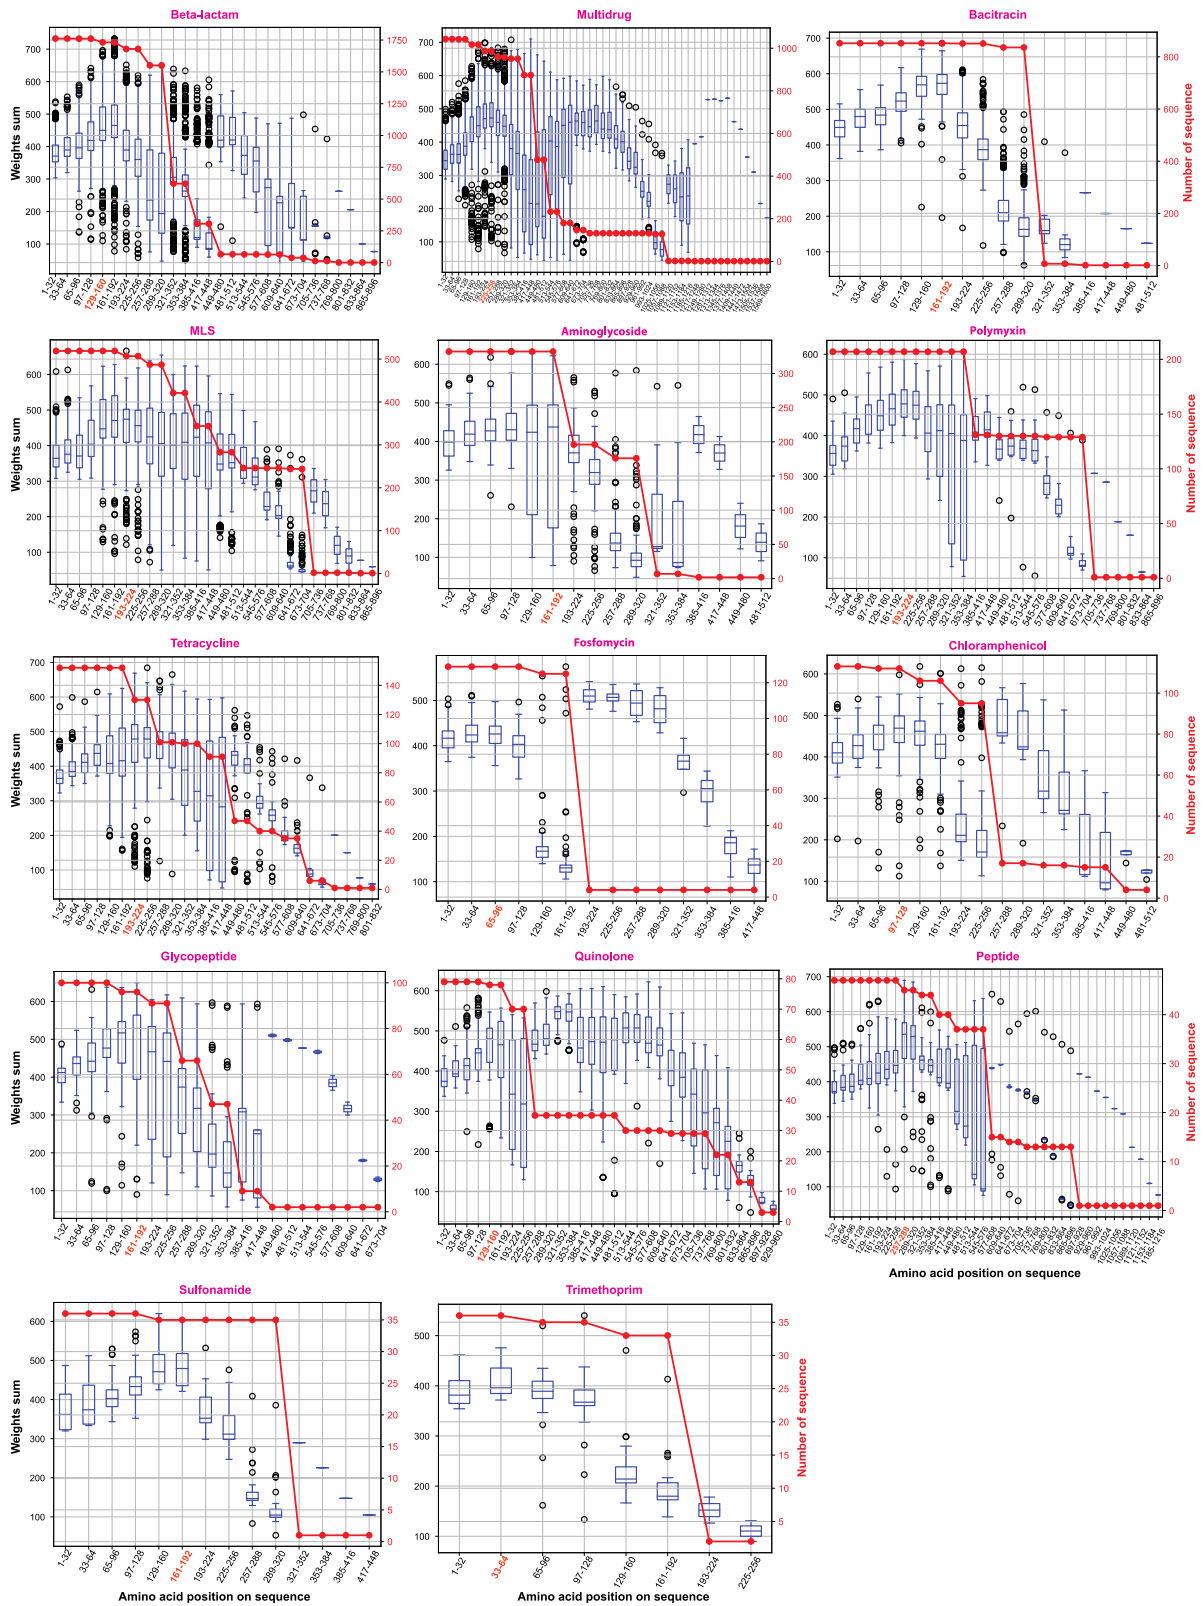

**Fig. S11: The weight sum distribution along sequence position in the latent space. Each boxplot represents the weight sum distribution of all test sequences in**

each category. The red line chart shows the number of sequences (right y-axis) on each range of positions (x-axis). The highest weight sum position ranges (x-axis) supported by enough number ( $> 90\%$ ) of sequences are highlighted in orange.
